# Supplementary material
Source: PubMed Central journal article supplement (PMC5274535)
Supplement: NIHMS70526-supplement-Supplementary_Tables.pdf [file NIHMS70526-supplement-Supplementary_Tables.pdf]

**Supplementary table 1: Summary of the cell distribution for RSC-implanted animals.**

|                        | <b>Rat 599</b> | <b>Rat 602</b> | <b>Rat 628</b> | <b>Rat 636</b> | <b>Total (n)</b> | <b>Total (%)</b> |
|------------------------|----------------|----------------|----------------|----------------|------------------|------------------|
| No. recording sessions | 28             | 25             | 16             | 16             | 85               |                  |
| Total cells            | 591            | 411            | 48             | 40             | 1090             |                  |
| HD cells               | 35             | 44             | 4              | 13             | 96               | 9                |
| BD cells               | 76             | 16             | 21             | 3              | 116              | 11               |
| BC-BD cells            | 30             | 5              | 10             | 1              | 46               | 4                |
| WC-BD cells            | 46             | 11             | 11             | 2              | 70               | 6                |

**Supplementary Table 2: Analysis of olfactory disambiguation of compartments**

**by HD cells.** Data are collapsed across trials: the p-values for analyses of individual trials are shown in Supp. Fig. 2. We compared the data against a null hypothesis of no use of olfactory cues and thus inability to distinguish the two apparatus orientations (predicting an even distribution between the zero +/- 30 degree sector and the 180 +/- 30 degree sector), and an alternative hypothesis of perfect use of olfactory cues (predicting a clustering of firing directions at zero +/- 30 degrees). 28 ensembles were recorded over 4 trials, totalling 112 data points, of which 108 lay within the sectors of interest. The predictions and data are shown in the table below, which shows that the behavior of the cells was significantly different from both hypotheses, revealing an above-chance, but incomplete, use of olfactory cues to disambiguate the compartments.

|                                                         | <b>Hypotheses</b>                                  |                                                       |                    |
|---------------------------------------------------------|----------------------------------------------------|-------------------------------------------------------|--------------------|
| <b>Predicted cluster sector</b>                         | <b>Null:<br/>Expected n if not using olfaction</b> | <b>Alternative:<br/>Expected n if using olfaction</b> | <b>Actual data</b> |
| -30 to +30 degrees                                      | 54                                                 | 108                                                   | 82                 |
| 150 to 210 degrees                                      | 54                                                 | 0                                                     | 26                 |
| <b>Total</b>                                            | <b>108</b>                                         | <b>108</b>                                            | <b>108</b>         |
| <b>Chi-square value testing hypothesis against data</b> | 15.56                                              | 29.56                                                 |                    |
| <b>P value</b>                                          | < 0.0001                                           | < 0.0001                                              |                    |

**Supplementary table 3: Summary of the firing characteristics of directional neurons.**

| Values are mean (s.e.m)                                | RSC BD                   |                          | RSC HD                   | PoS                     | ADN                     |
|--------------------------------------------------------|--------------------------|--------------------------|--------------------------|-------------------------|-------------------------|
| Peak firing rate (Hz)*                                 | 5.09 (0.37)<br>n = 116   |                          | 7.59 (0.88)<br>n = 96    | 5.13 (0.55)<br>n = 39   | 18.17 (2.60)<br>n = 31  |
| Peak firing rate for closed-door trials 3 and 4 (Hz)** | <b>BC-BD</b>             | <b>WC-BD</b>             | <b>RSC HD</b>            |                         |                         |
|                                                        | 7.19 (1.01)<br>n = 46    | 6.70 (0.53)<br>n = 70    | 7.01 (0.69)<br>n = 96    |                         |                         |
| Mean firing rate for closed-door trials 3 and 4 (Hz)** | 3.05 (0.37)<br>n = 46    | 3.90 (0.33)<br>n = 70    | 3.39 (0.39)<br>n = 96    |                         |                         |
| ISI histogram peak latency (ms)***                     | 35.24 (2.86)<br>n = 116  |                          | 38.35 (4.11)<br>n = 96   | 35.05 (12.82)<br>n = 39 | 18.16 (4.21)<br>n = 31  |
|                                                        | <b>BC-BD</b>             | <b>WC-BD</b>             |                          |                         |                         |
|                                                        | 33.43 (4.40)<br>n = 46   | 36.48 (3.79)<br>n = 70   |                          |                         |                         |
| Decay time to half-peak (ms)****                       | 120.60 (8.34)<br>n = 116 |                          | 135.31 (11.82)<br>n = 96 | 91.28 (13.39)<br>n = 39 | 75.68 (16.76)<br>n = 31 |
|                                                        | <b>BC-BD</b>             | <b>WC-BD</b>             |                          |                         |                         |
|                                                        | 107.57 (11.95)<br>n = 46 | 129.48 (11.36)<br>n = 70 |                          |                         |                         |

HD = head direction cells; BD = bi-directional cells; WC-BD = within-compartment BD cells; BC-BD = between-compartment BD cells

\* [F(3,278) = 26.3, p < 0.0001]. Post hoc tests (Bonferroni corrected) showed that ADN rates were significantly higher than RSC bi-directional cells [t(145) = 8.62, p < 0.001], RSC HD cells [t(125) = 5.0, p < 0.001] and PoS HD cells [t(68) = 5.44, p < 0.001].

\*\*Comparison of firing rates for directional cell subtypes found no difference for peak rates [F(2,209) = 0.10, p = 0.90] or mean rates [F(2,209) = 1.00, p = 0.36].

\*\*\* ANOVA on log-transformed data: [F(3,120) = 4.2, p < 0.01]; post hoc tests (Bonferroni-corrected) showed that the ADN time-to-peak was significantly shorter than RSC bi-directional cells [t(124) = 3.03, p = 0.02] and RSC HD cells [t(145) = 3.85, p = 0.001] but not PoS HD cells [t(68) = 1.91, NS]. The other cell types did not differ. The ISI peak times

between within-compartment (WC) and between-compartment (BC) di-directional cells did not differ [one-tailed  $t(114) = 0.52$ ,  $p = 0.30$ ].

\*\*\*\* The decay time to half-peak, which is a measure of the proportion of longer intervals in the spike train, was also shorter for ADN neurons. ANOVA showed that this was significant [ $F(3,278) = 9.60$ ,  $p = 0.0001$ ]; post hoc tests (Bonferroni-corrected) showed that it was shorter than RSC bi-directional cells [ $t(145) = 4.90$ ,  $p < 0.01$ ] and RSC HD cells [ $t(124) = 4.27$ ,  $p = 0.001$ ] but not shorter than PoS HD cells [ $t(68) = 2.16$ , NS]. The other cell types did not differ. The decay times also did not differ between WC and BC cells [ $t(114) = 1.29$ ,  $p = 0.10$ ].
